# Supplementary material for: Synergetic degradation of organic dyes and Cr(vi) by the piezocatalytic BZT-xBCT
Source: Royal Society of Chemistry journal article supplement (doi:10.1039/d1nj06127e), 2022-01-01
Supplement: d1nj06127e1.pdf [file d1nj06127e1.pdf]

## Supporting Information

### Synergetic degradation of organic dyes and Cr(VI) by piezocatalytic BZT-xBCT

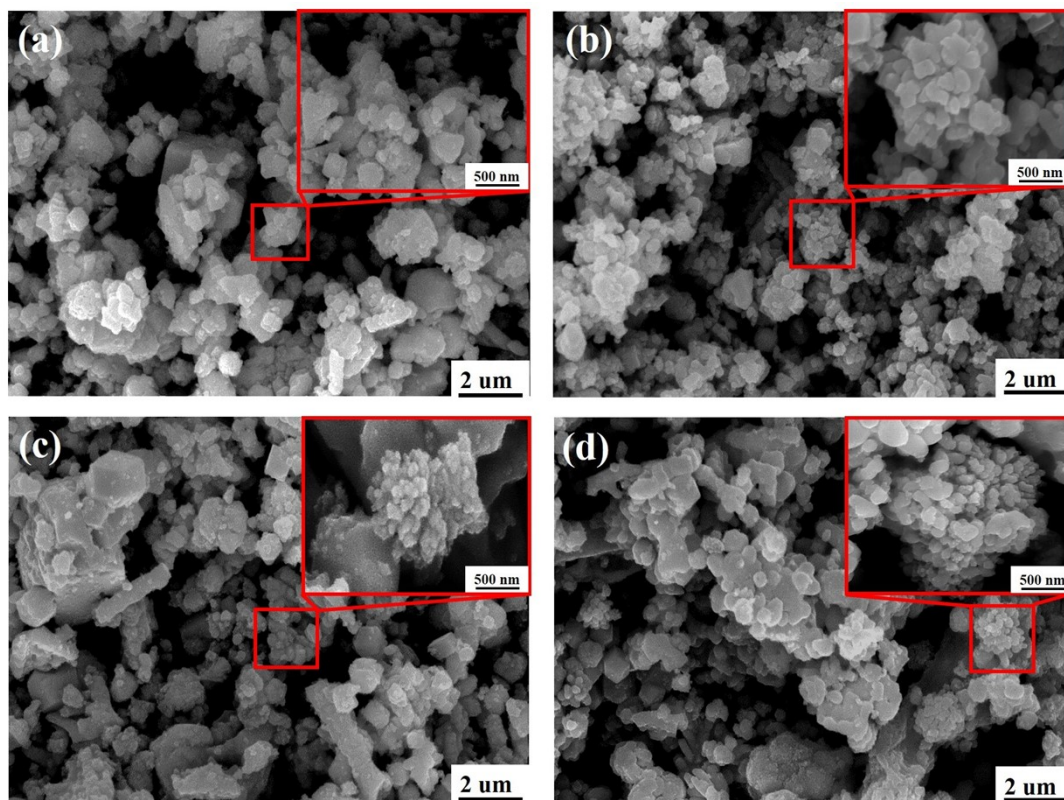

Figure S1. (a-d) FESEM image of BZT-xBCT samples ( $x=0.4, 0.5, 0.6, 0.7$ ).

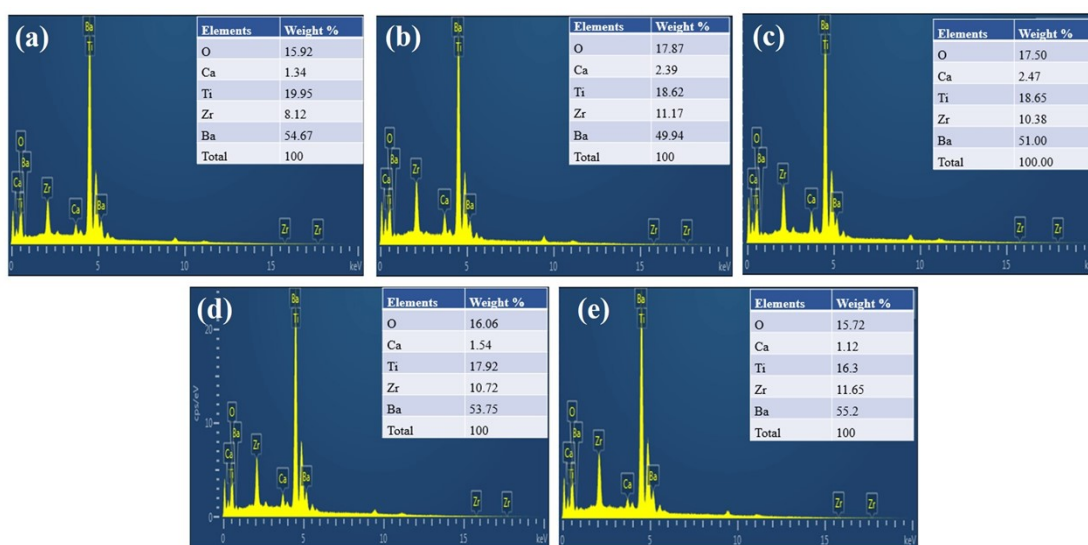

Figure S2 The EDX spectrometer of BZT-xBCT ( $x=0.3, 0.4, 0.5, 0.6, 0.7$ ).

**Table S1.** The weight and atomic percentages of BZT-*x*BCT (*x*=0.3, 0.4, 0.5, 0.6, 0.7) calculated by EDX spectrometer for Ba, Ca, Ti, Zr, O five elements.

|          | BZT-0.3BCT  | BZT-0.4BCT | BZT-0.5BCT | BZT-0.6BCT | BZT-0.7BCT  |
|----------|-------------|------------|------------|------------|-------------|
| Element% | Atomic      | Atomic     | Atomic     | Atomic     | Atomic      |
| O        | 52.3        | 52.1       | 53.9       | 54.5       | 52.0        |
| Ca       | 1.5         | 2.0        | 3.0        | 2.8        | 1.7         |
| Ti       | <b>18.1</b> | 19.4       | 19.2       | 19.0       | <b>23.0</b> |
| Zr       | 6.8         | 6.1        | 5.6        | 5.8        | 3.3         |
| Ba       | <b>21.3</b> | 20.4       | 18.3       | 17.8       | <b>20.0</b> |

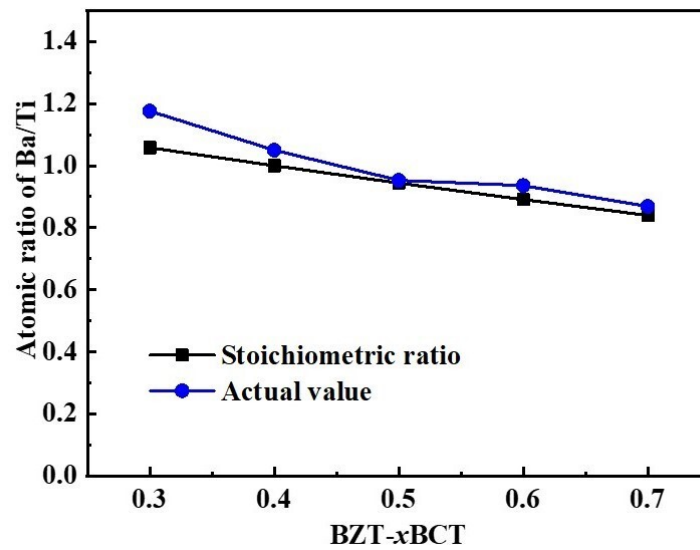

**Figure S3.** The relative atomic percentage of Ba and Ti in BZT-*x*BCT (*x*=0.3, 0.4, 0.5, 0.6, 0.7) samples.

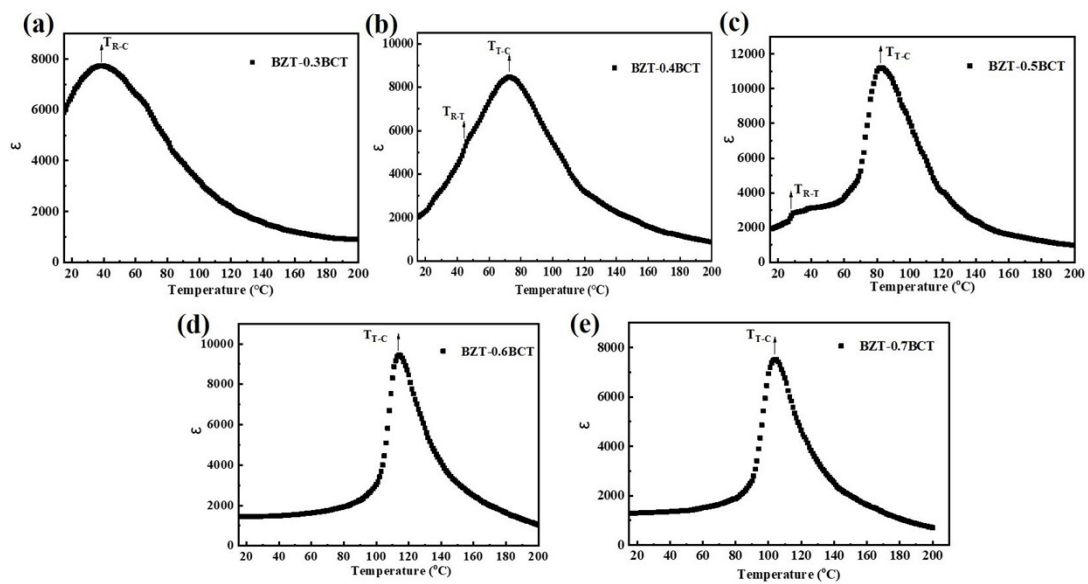

**Figure S4.** The curve of dielectric permittivity versus temperature for BZT-*x*BCT (*x*=0.3, 0.4, 0.5, 0.6, 0.7) ceramic samples.

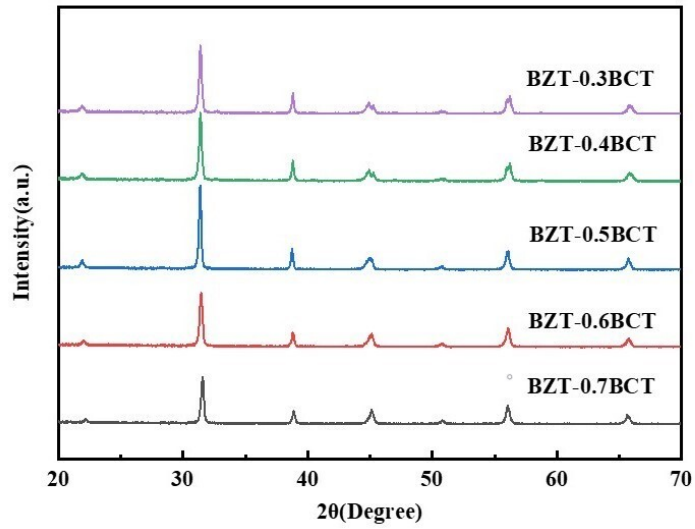

**Figure S5.** The XRD patterns of BZT- $x$ BCT ( $x=0.3, 0.4, 0.5, 0.6, 0.7$ ) ceramic.

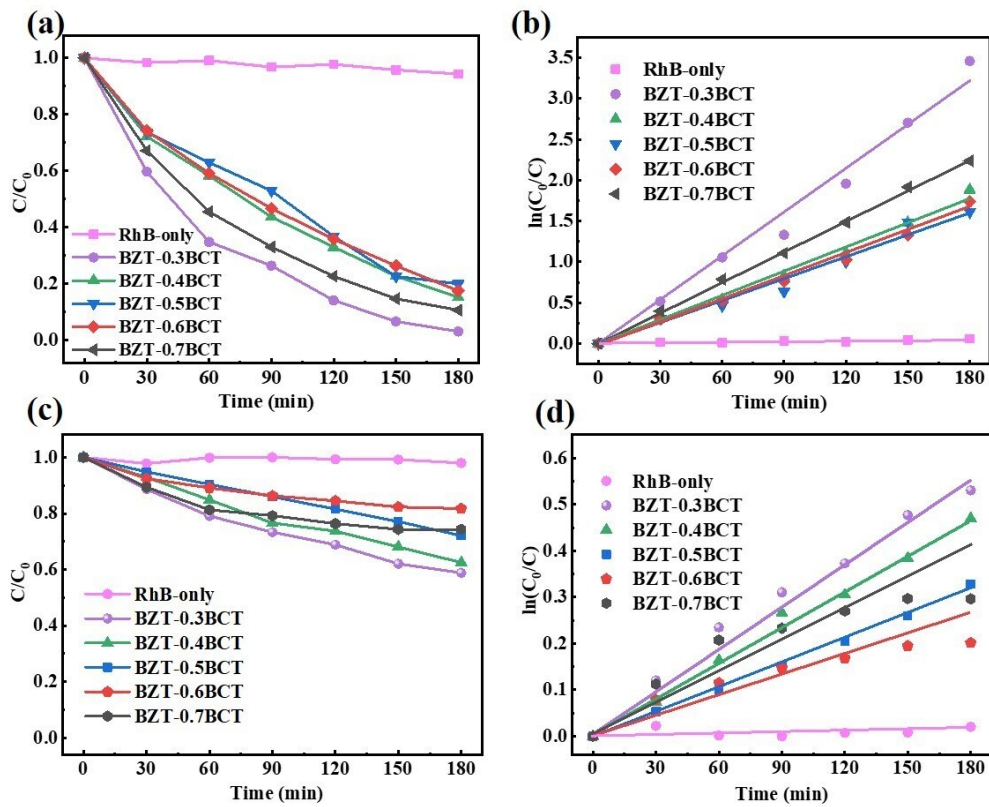

**Figure S6.** (a, b) The  $C/C_0$  and  $\ln(C_0/C)$  of BZT- $x$ BCT ( $x=0.3, 0.4, 0.5, 0.6, 0.7$ ) for RhB (5mg/L). (c, d) The  $C/C_0$  and  $\ln(C_0/C)$  of BZT- $x$ BCT ( $x=0.3, 0.4, 0.5, 0.6, 0.7$ ) for RhB (20mg/L).

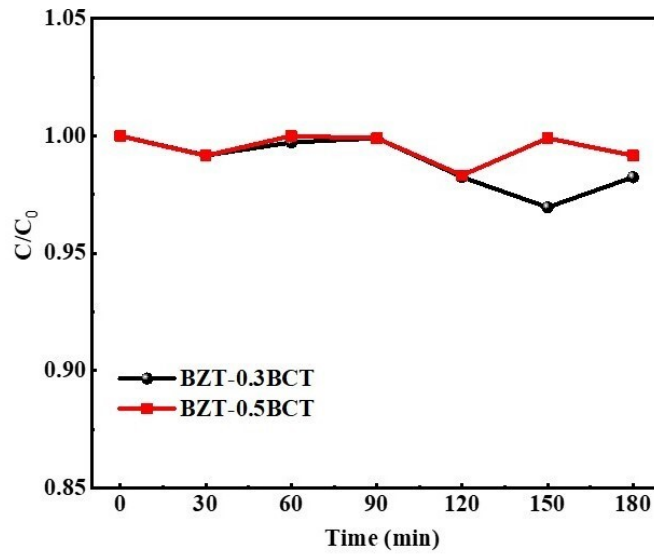

**Figure S7.** The contribute of pyroelectricity effect to degradation efficiency for BZT-0.3BCT and BZT-0.5BCT.

The role of pyroelectricity during the ultrasonication process was also investigated to exclude the effect of changing water to maintain the water temperature stability. The BZT-0.3BCT and BZT-0.5BCT experiment involved the water temperature was carried out by alternated changing between the room temperature and 40°C each 5 min, and low-speed mixing replaced the ultrasonic vibration, the experiment result revealed alternated changed water temperature has negligible influence on the degradation efficiency (Figure. S7).

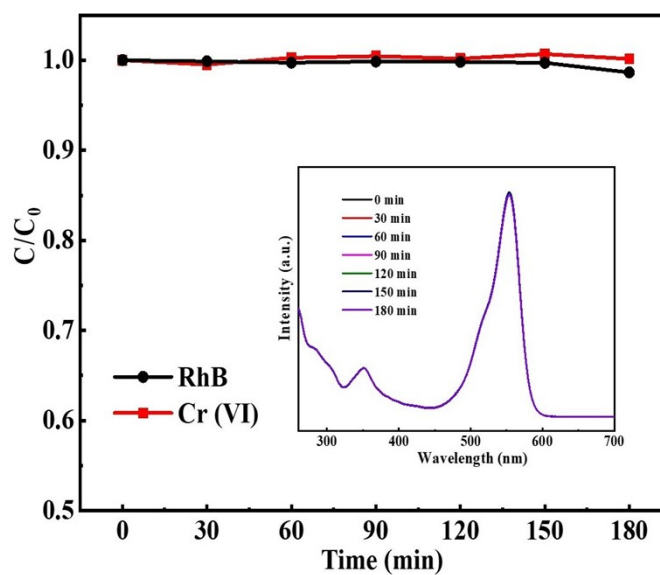

**Figure S8.** The piezocatalytic performance to degrade RhB and Cr(VI) mixed pollutant without BZT-0.3BCT samples.( The inset shows the UV-Vis absorption spectra of degradation.)

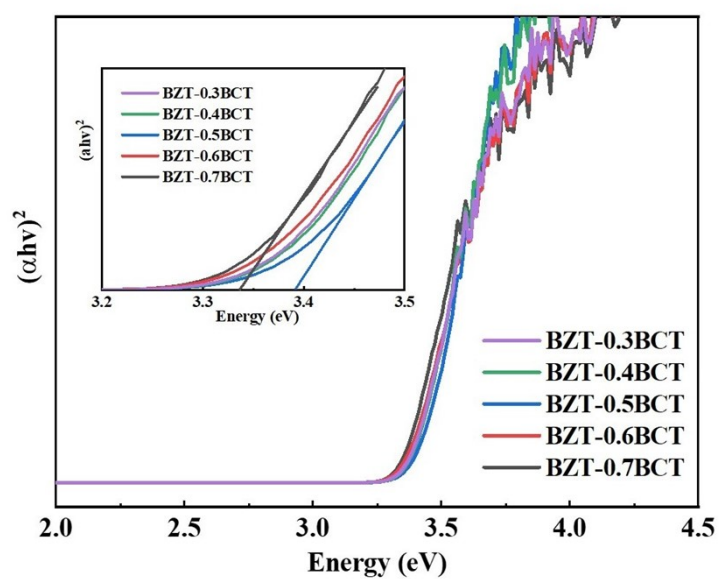

**Figure S9.** The band gap values of BZT- $x$ BCT ( $x=0.3, 0.4, 0.5, 0.6, 0.7$ ) samples.

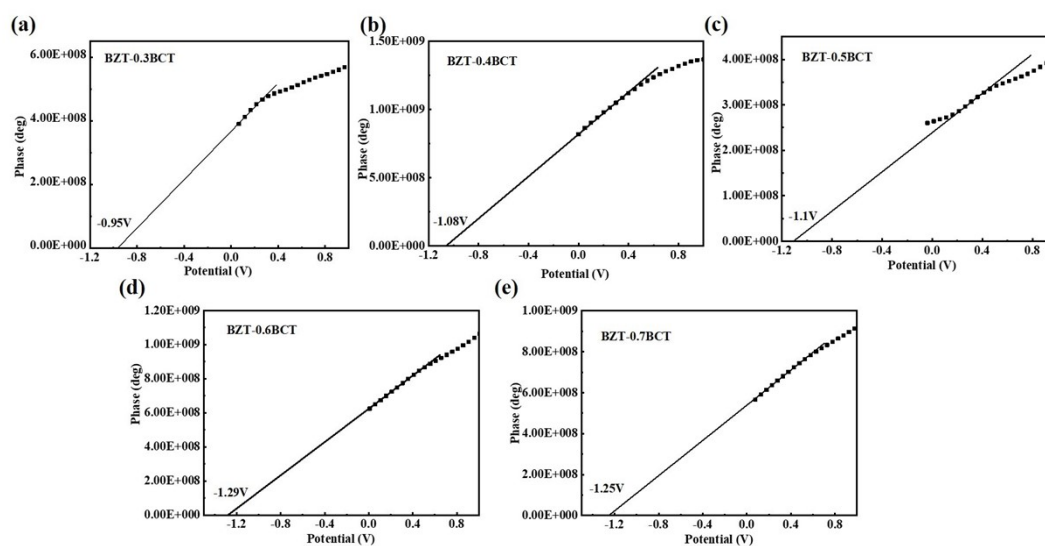

**Figure S10.** The Mott-Schottky plots of BZT- $x$ BCT ( $x=0.3, 0.4, 0.5, 0.6, 0.7$ ) samples.



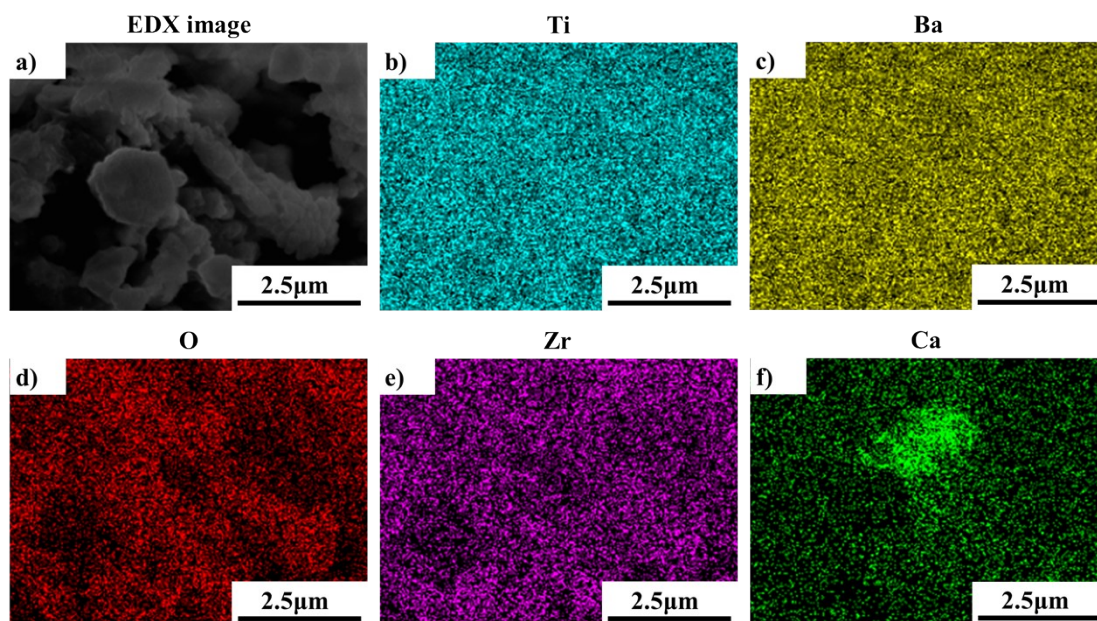

Figure S11. Elemental mapping images of BZT-0.3BCT sample.

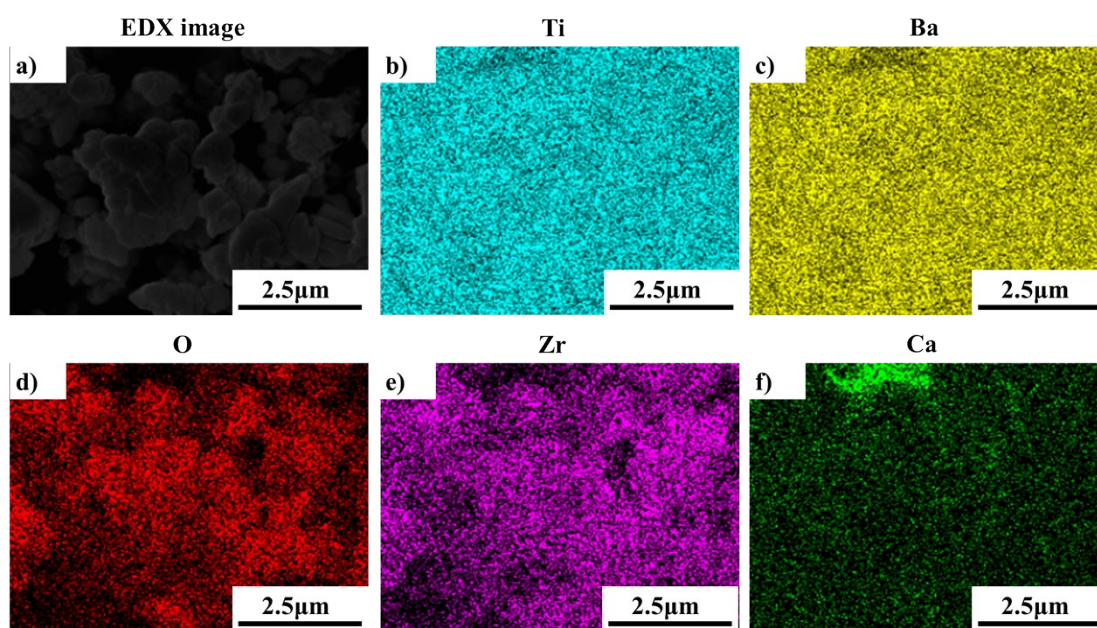

Figure S12. Elemental mapping images of BZT-0.4BCT sample.



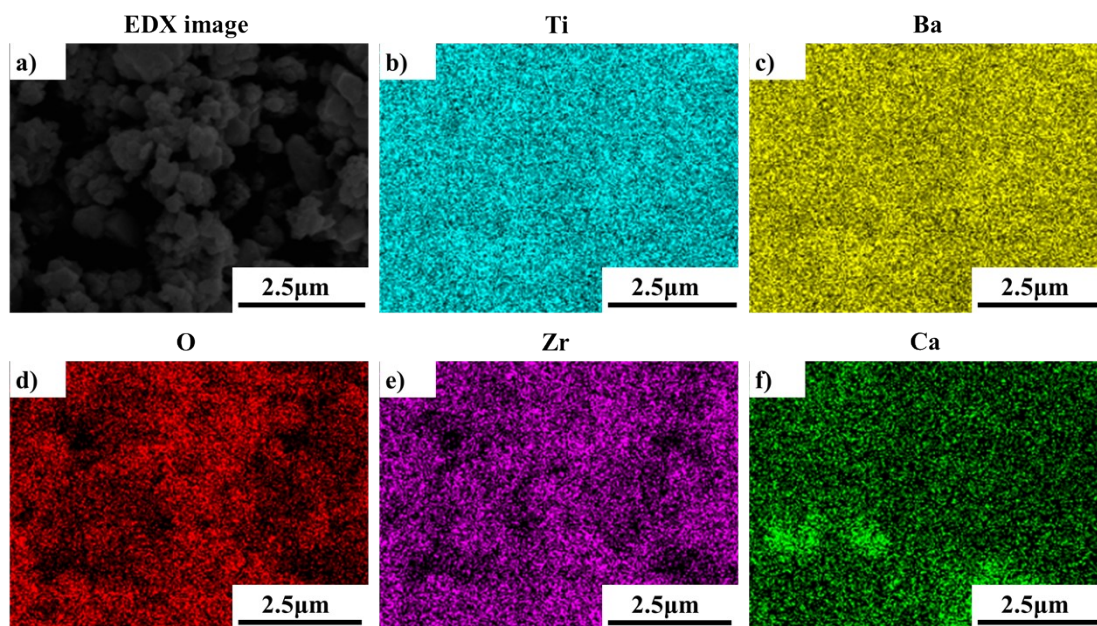

Figure S13. Elemental mapping images of BZT-0.5BCT sample.

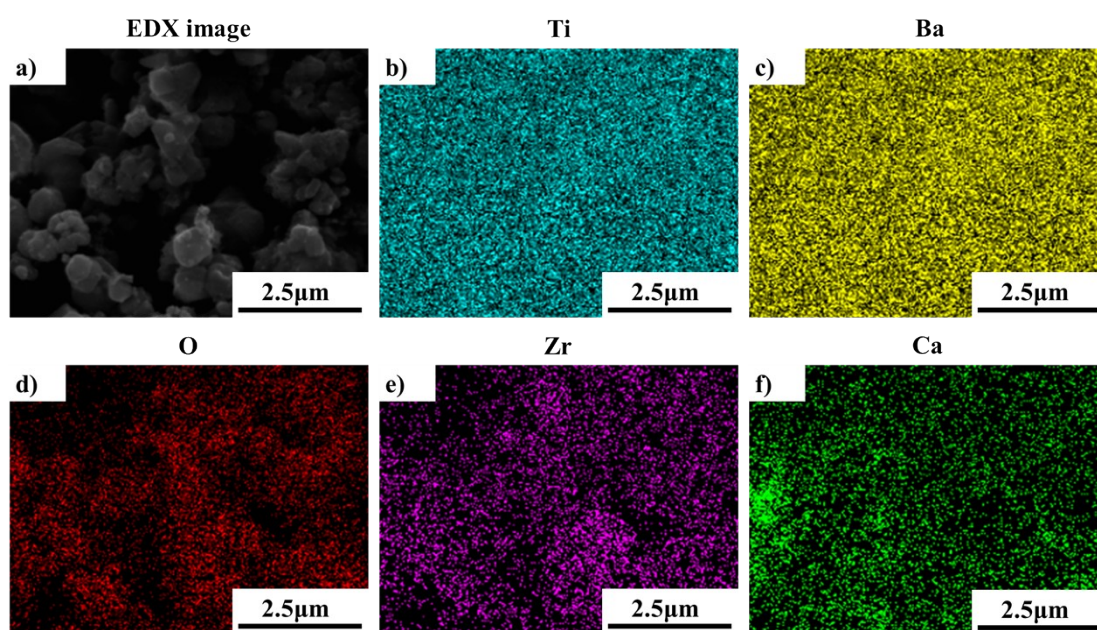

Figure S14. Elemental mapping images of BZT-0.6BCT samples.

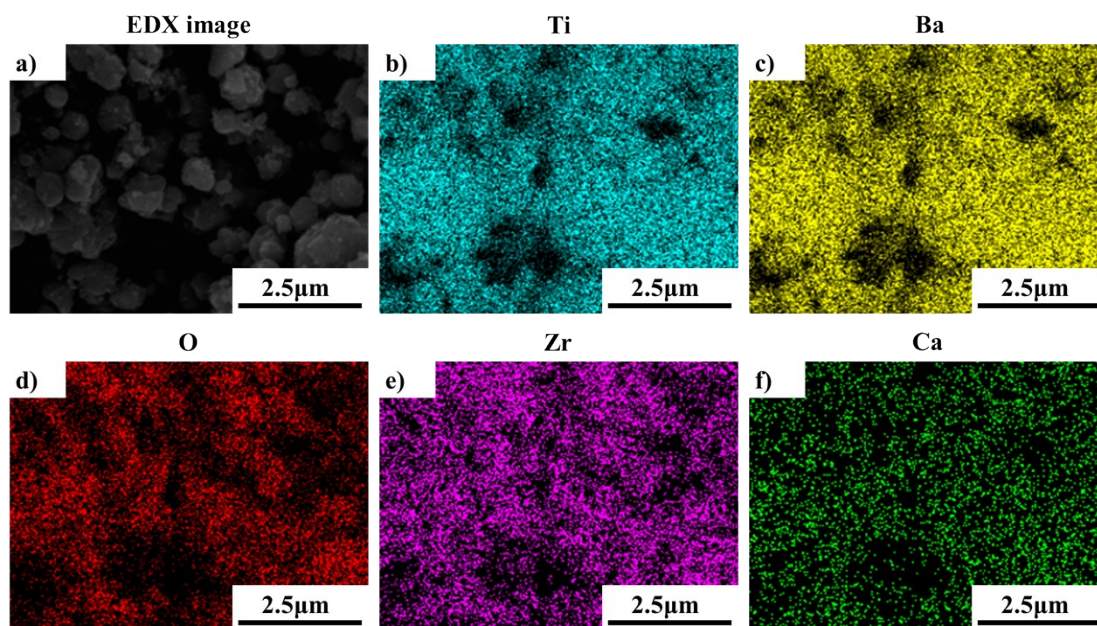

**Figure S15.** Elemental mapping images of BZT-0.7BCT samples.

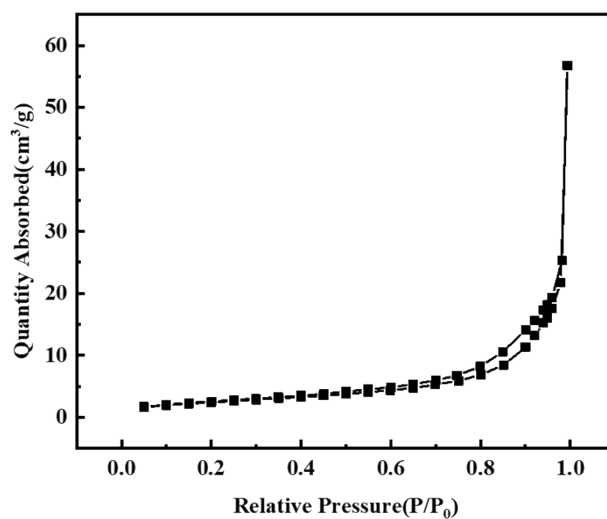

**Figure S16.** Nitrogen adsorption-desorption isotherms of BZT-0.3BCT nanoparticles.



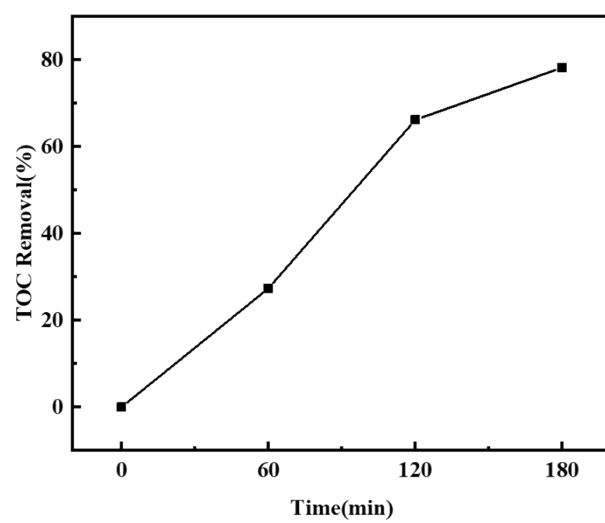

**Figure S17.** Nitrogen adsorption-desorption isotherms of BZT-0.3BCT nanoparticles.
